# Supplementary material for: Survival benefit of glioblastoma patients after FDA approval of temozolomide concomitant with radiation and bevacizumab: A population-based study
Source: PubMed Central journal article supplement (PMC5546458; doi:10.18632/oncotarget.17054), 2017-04-12
Supplement: oncotarget-08-44015-s001.pdf [file oncotarget-08-44015-s001.pdf]

## **Survival benefit of glioblastoma patients after FDA approval of temozolomide concomitant with radiation and bevacizumab: A population-based study**

### **SUPPLEMENTARY MATERIALS**

#### **SUPPLEMENTARY TABLES AND FIGURES**

**Supplementary Table 1: Comparison of the related randomized clinical trials and population-based studies on TMZ and BEV in GBM treatment**

See Supplementary File 1

**Supplementary Table 2: Median OS, 1-year and 2-year survival rate by calendar period of diagnosis in SEER and TCR with extended follow-up\***

See Supplementary File 2

**Supplementary Table 3: Risk of death among GBM patients in relation to calendar period of diagnosis in TCR with extended follow-up (N=4355)**

See Supplementary File 2

**Supplementary Table 4: Risk of death in GBM patients by calendar period of diagnosis and by time-varying covariates in TCR with extended follow-up\***

| Time-varying covariates   | Calendar Period of Diagnosis |       |      |             |      |             |
|---------------------------|------------------------------|-------|------|-------------|------|-------------|
|                           | P1                           |       | P2   |             | P3   |             |
|                           | HR                           | 95%CI | HR   | 95%CI       | HR   | 95%CI       |
| Age group at diagnosis    |                              |       |      |             |      |             |
| 20-49                     | 1.00                         | -     | 0.85 | 0.70 - 1.02 | 0.55 | 0.45 - 0.68 |
| 50-59                     | 1.00                         | -     | 0.80 | 0.69 - 0.93 | 0.52 | 0.44 - 0.60 |
| 60-69                     | 1.00                         | -     | 0.83 | 0.71 - 0.96 | 0.61 | 0.52 - 0.70 |
| 70-                       | 1.00                         | -     | 0.79 | 0.68 - 0.93 | 0.80 | 0.68 - 0.93 |
| Tumor site                |                              |       |      |             |      |             |
| Supratentorial            | 1.00                         | -     | 0.77 | 0.70 - 0.84 | 0.59 | 0.54 - 0.65 |
| Infratentorial/<br>NOS    | 1.00                         | -     | 0.89 | 0.36 - 2.19 | 0.61 | 0.24 - 1.53 |
| Surgery                   |                              |       |      |             |      |             |
| No surgery                | 1.00                         | -     | 0.91 | 0.75 - 1.10 | 0.81 | 0.67 - 0.98 |
| Local excision/<br>biopsy | 1.00                         | -     | 0.77 | 0.65 - 0.92 | 0.62 | 0.52 - 0.74 |
| Partial resection         | 1.00                         | -     | 0.81 | 0.69 - 0.95 | 0.56 | 0.48 - 0.66 |
| GTR                       | 1.00                         | -     | 0.78 | 0.68 - 0.89 | 0.57 | 0.50 - 0.66 |
| Radiation                 |                              |       |      |             |      |             |
| Untreated                 | 1.00                         | -     | 0.85 | 0.72 - 1.00 | 0.64 | 0.55 - 0.75 |
| Treated                   | 1.00                         | -     | 0.78 | 0.71 - 0.86 | 0.63 | 0.57 - 0.69 |

Abbreviation: Calendar period of diagnosis, including P1, P2 and P3 (P1, Jan 2000-Feb 2005; P2, Mar 2005-Apr 2009; P3, May 2009-Dec 2013); NOS, not otherwise specified; GTR, gross total resection; HR, hazard ratio; 95%CI, 95% confidence interval.

\*: Adjusted age at diagnosis, sex, race/ethnicity, marital status, tumor site, surgery and radiation as appropriate.

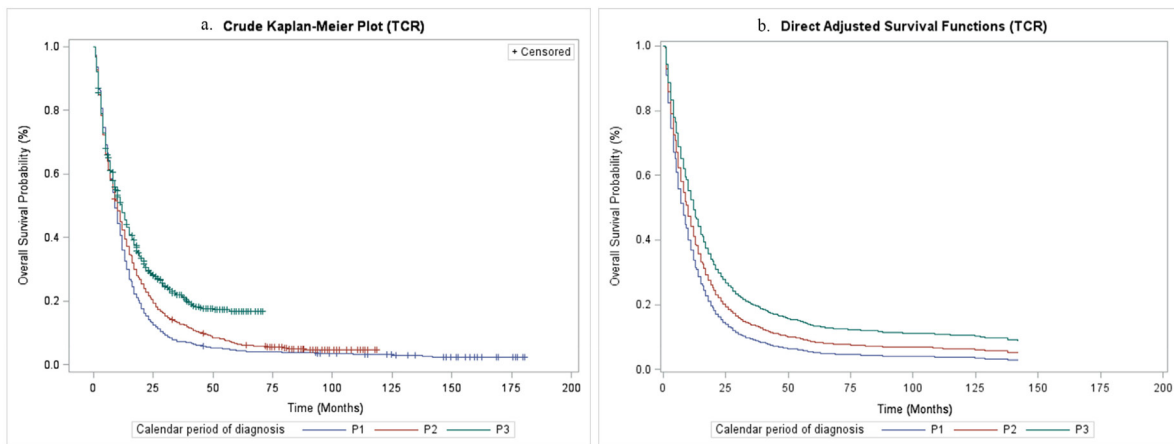

**Supplementary Figure 1: Overall survival of GBM patients by calendar period of diagnosis in TCR with extended follow-up. (a) Crude overall survival in TCR with extended follow-up; (b) Direct adjusted survival after adjusting covariates in TCR with extended follow-up;**

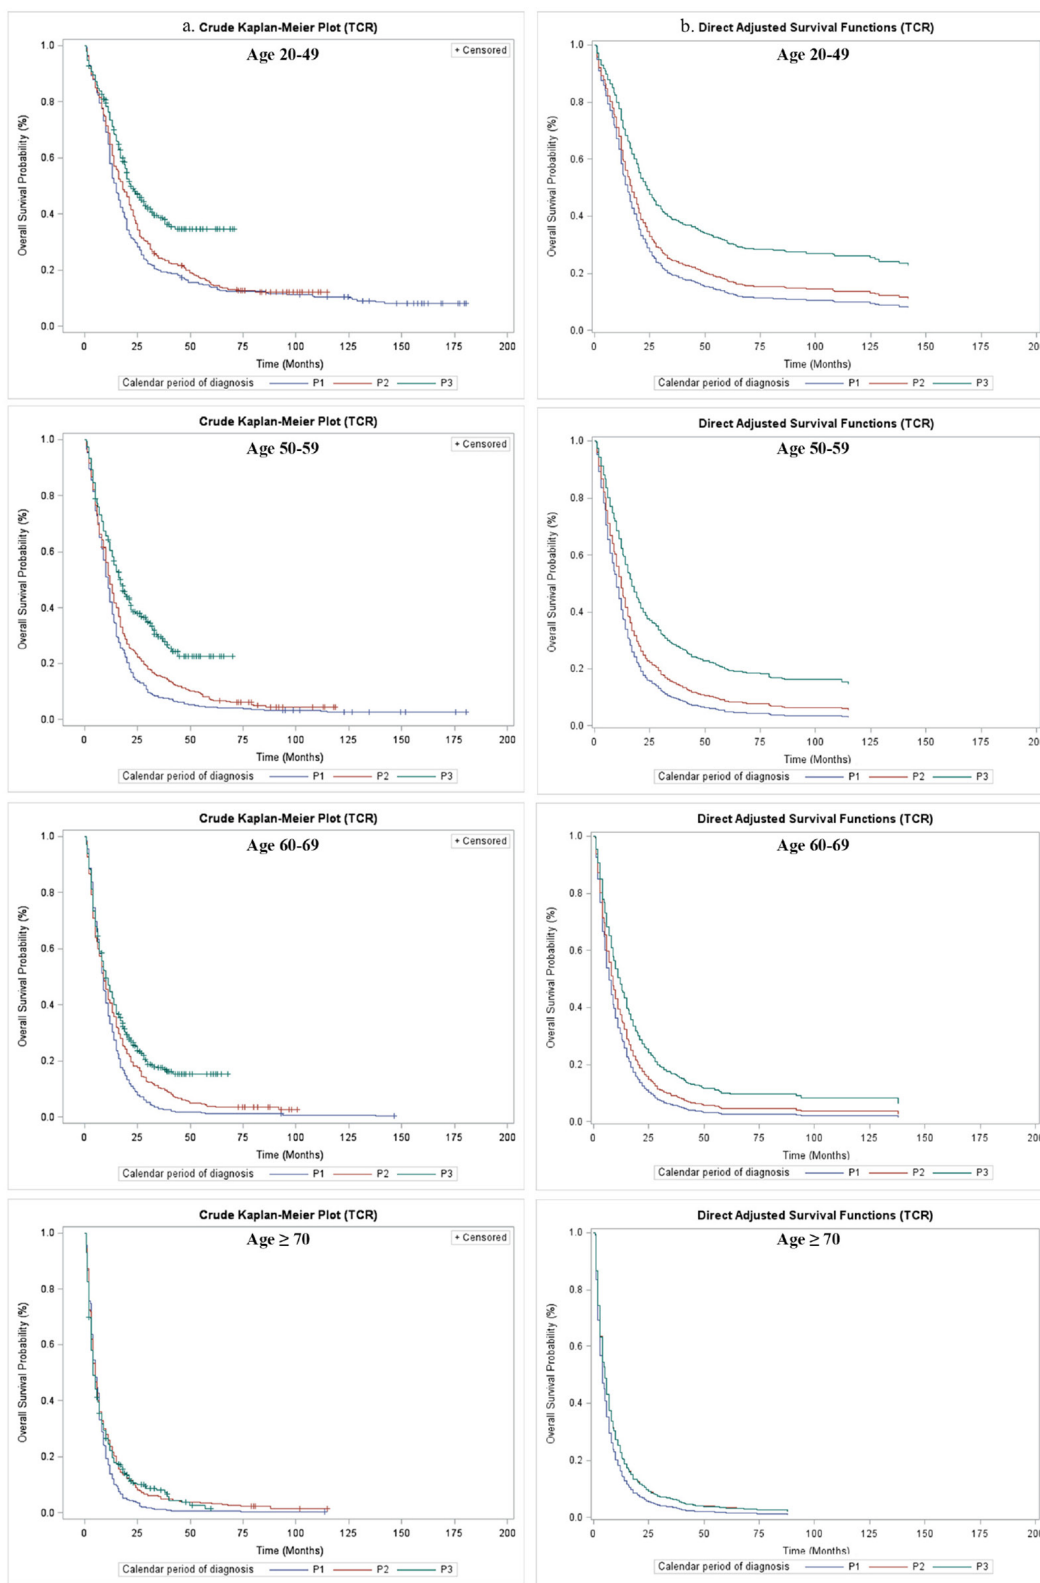

**Supplementary Figure 2: Overall survival of GBM patients by calendar period of diagnosis and age group at diagnosis in TCR with extended follow-up. (a)** Crude overall survival stratified by age group at diagnosis in TCR with extended follow-up; **(b)** Direct adjusted survival after adjusting covariates stratified by age group at diagnosis in TCR with extended follow-up;
